# Supplementary material for: The development of nations conditions the disease space
Source: PubMed Central journal article supplement (PMC7790431; doi:10.1371/journal.pone.0244843), 2021-01-07
Supplement: pone.0244843.s001.pdf [file pone.0244843.s001.pdf]

S1 Table. List of countries in the dataset.

| Country id | Country name                   | Region                   | World Bank group               |
|------------|--------------------------------|--------------------------|--------------------------------|
| 6          | China                          | East Asia                | World Bank Upper Middle Income |
| 7          | North Korea                    | East Asia                | World Bank Low Income          |
| 8          | Taiwan                         | East Asia                | World Bank High Income         |
| 10         | Cambodia                       | Southeast Asia           | World Bank Lower Middle Income |
| 11         | Indonesia                      | Southeast Asia           | World Bank Lower Middle Income |
| 12         | Laos                           | Southeast Asia           | World Bank Lower Middle Income |
| 13         | Malaysia                       | Southeast Asia           | World Bank Upper Middle Income |
| 14         | Maldives                       | Southeast Asia           | World Bank Upper Middle Income |
| 15         | Myanmar                        | Southeast Asia           | World Bank Lower Middle Income |
| 16         | Philippines                    | Southeast Asia           | World Bank Lower Middle Income |
| 17         | Sri Lanka                      | Southeast Asia           | World Bank Lower Middle Income |
| 18         | Thailand                       | Southeast Asia           | World Bank Upper Middle Income |
| 19         | Timor-Leste                    | Southeast Asia           | World Bank Lower Middle Income |
| 20         | Vietnam                        | Southeast Asia           | World Bank Lower Middle Income |
| 22         | Fiji                           | Oceania                  | World Bank Upper Middle Income |
| 23         | Kiribati                       | Oceania                  | World Bank Lower Middle Income |
| 24         | Marshall Islands               | Oceania                  | World Bank Upper Middle Income |
| 25         | Federated States of Micronesia | Oceania                  | World Bank Lower Middle Income |
| 26         | Papua New Guinea               | Oceania                  | World Bank Lower Middle Income |
| 27         | Samoa                          | Oceania                  | World Bank Upper Middle Income |
| 28         | Solomon Islands                | Oceania                  | World Bank Lower Middle Income |
| 29         | Tonga                          | Oceania                  | World Bank Upper Middle Income |
| 30         | Vanuatu                        | Oceania                  | World Bank Lower Middle Income |
| 33         | Armenia                        | Central Asia             | World Bank Lower Middle Income |
| 34         | Azerbaijan                     | Central Asia             | World Bank Upper Middle Income |
| 35         | Georgia                        | Central Asia             | World Bank Lower Middle Income |
| 36         | Kazakhstan                     | Central Asia             | World Bank Upper Middle Income |
| 37         | Kyrgyzstan                     | Central Asia             | World Bank Lower Middle Income |
| 38         | Mongolia                       | Central Asia             | World Bank Lower Middle Income |
| 39         | Tajikistan                     | Central Asia             | World Bank Lower Middle Income |
| 40         | Turkmenistan                   | Central Asia             | World Bank Upper Middle Income |
| 41         | Uzbekistan                     | Central Asia             | World Bank Lower Middle Income |
| 43         | Albania                        | Central Europe           | World Bank Upper Middle Income |
| 44         | Bosnia and Herzegovina         | Central Europe           | World Bank Upper Middle Income |
| 45         | Bulgaria                       | Central Europe           | World Bank Upper Middle Income |
| 46         | Croatia                        | Central Europe           | World Bank Upper Middle Income |
| 47         | Czech Republic                 | Central Europe           | World Bank High Income         |
| 48         | Hungary                        | Central Europe           | World Bank High Income         |
| 49         | Macedonia                      | Central Europe           | World Bank Upper Middle Income |
| 50         | Montenegro                     | Central Europe           | World Bank Upper Middle Income |
| 51         | Poland                         | Central Europe           | World Bank High Income         |
| 52         | Romania                        | Central Europe           | World Bank Upper Middle Income |
| 53         | Serbia                         | Central Europe           | World Bank Upper Middle Income |
| 54         | Slovakia                       | Central Europe           | World Bank High Income         |
| 55         | Slovenia                       | Central Europe           | World Bank High Income         |
| 57         | Belarus                        | Eastern Europe           | World Bank Upper Middle Income |
| 58         | Estonia                        | Eastern Europe           | World Bank High Income         |
| 59         | Latvia                         | Eastern Europe           | World Bank High Income         |
| 60         | Lithuania                      | Eastern Europe           | World Bank High Income         |
| 61         | Moldova                        | Eastern Europe           | World Bank Lower Middle Income |
| 62         | Russian Federation             | Eastern Europe           | World Bank Upper Middle Income |
| 63         | Ukraine                        | Eastern Europe           | World Bank Lower Middle Income |
| 66         | Brunei                         | High-income Asia Pacific | World Bank High Income         |
| 67         | Japan                          | High-income Asia Pacific | World Bank High Income         |
| 68         | South Korea                    | High-income Asia Pacific | World Bank High Income         |
| 69         | Singapore                      | High-income Asia Pacific | World Bank High Income         |
| 71         | Australia                      | Australasia              | World Bank High Income         |
| 72         | New Zealand                    | Australasia              | World Bank High Income         |
| 74         | Andorra                        | Western Europe           | World Bank High Income         |
| 75         | Austria                        | Western Europe           | World Bank High Income         |

| Continuation of Table ?? |                                  |                              |                                |
|--------------------------|----------------------------------|------------------------------|--------------------------------|
| Country id               | Country name                     | Region                       | World Bank group               |
| 76                       | Belgium                          | Western Europe               | World Bank High Income         |
| 77                       | Cyprus                           | Western Europe               | World Bank High Income         |
| 78                       | Denmark                          | Western Europe               | World Bank High Income         |
| 79                       | Finland                          | Western Europe               | World Bank High Income         |
| 80                       | France                           | Western Europe               | World Bank High Income         |
| 81                       | Germany                          | Western Europe               | World Bank High Income         |
| 82                       | Greece                           | Western Europe               | World Bank High Income         |
| 83                       | Iceland                          | Western Europe               | World Bank High Income         |
| 84                       | Ireland                          | Western Europe               | World Bank High Income         |
| 85                       | Israel                           | Western Europe               | World Bank High Income         |
| 86                       | Italy                            | Western Europe               | World Bank High Income         |
| 87                       | Luxembourg                       | Western Europe               | World Bank High Income         |
| 88                       | Malta                            | Western Europe               | World Bank High Income         |
| 89                       | Netherlands                      | Western Europe               | World Bank High Income         |
| 90                       | Norway                           | Western Europe               | World Bank High Income         |
| 91                       | Portugal                         | Western Europe               | World Bank High Income         |
| 92                       | Spain                            | Western Europe               | World Bank High Income         |
| 93                       | Sweden                           | Western Europe               | World Bank High Income         |
| 94                       | Switzerland                      | Western Europe               | World Bank High Income         |
| 95                       | United Kingdom                   | Western Europe               | World Bank High Income         |
| 97                       | Argentina                        | Southern Latin America       | World Bank Upper Middle Income |
| 98                       | Chile                            | Southern Latin America       | World Bank High Income         |
| 99                       | Uruguay                          | Southern Latin America       | World Bank High Income         |
| 101                      | Canada                           | High-income North America    | World Bank High Income         |
| 102                      | United States                    | High-income North America    | World Bank High Income         |
| 105                      | Antigua and Barbuda              | Caribbean                    | World Bank High Income         |
| 106                      | The Bahamas                      | Caribbean                    | World Bank High Income         |
| 107                      | Barbados                         | Caribbean                    | World Bank High Income         |
| 108                      | Belize                           | Caribbean                    | World Bank Upper Middle Income |
| 109                      | Cuba                             | Caribbean                    | World Bank Upper Middle Income |
| 110                      | Dominica                         | Caribbean                    | World Bank Upper Middle Income |
| 111                      | Dominican Republic               | Caribbean                    | World Bank Upper Middle Income |
| 112                      | Grenada                          | Caribbean                    | World Bank Upper Middle Income |
| 113                      | Guyana                           | Caribbean                    | World Bank Upper Middle Income |
| 114                      | Haiti                            | Caribbean                    | World Bank Low Income          |
| 115                      | Jamaica                          | Caribbean                    | World Bank Upper Middle Income |
| 116                      | Saint Lucia                      | Caribbean                    | World Bank Upper Middle Income |
| 117                      | Saint Vincent and the Grenadines | Caribbean                    | World Bank Upper Middle Income |
| 118                      | Suriname                         | Caribbean                    | World Bank Upper Middle Income |
| 119                      | Trinidad and Tobago              | Caribbean                    | World Bank High Income         |
| 121                      | Bolivia                          | Andean Latin America         | World Bank Lower Middle Income |
| 122                      | Ecuador                          | Andean Latin America         | World Bank Upper Middle Income |
| 123                      | Peru                             | Andean Latin America         | World Bank Upper Middle Income |
| 125                      | Colombia                         | Central Latin America        | World Bank Upper Middle Income |
| 126                      | Costa Rica                       | Central Latin America        | World Bank Upper Middle Income |
| 127                      | El Salvador                      | Central Latin America        | World Bank Lower Middle Income |
| 128                      | Guatemala                        | Central Latin America        | World Bank Lower Middle Income |
| 129                      | Honduras                         | Central Latin America        | World Bank Lower Middle Income |
| 130                      | Mexico                           | Central Latin America        | World Bank Upper Middle Income |
| 131                      | Nicaragua                        | Central Latin America        | World Bank Lower Middle Income |
| 132                      | Panama                           | Central Latin America        | World Bank Upper Middle Income |
| 133                      | Venezuela                        | Central Latin America        | World Bank Upper Middle Income |
| 135                      | Brazil                           | Tropical Latin America       | World Bank Upper Middle Income |
| 136                      | Paraguay                         | Tropical Latin America       | World Bank Upper Middle Income |
| 139                      | Algeria                          | North Africa and Middle East | World Bank Upper Middle Income |
| 140                      | Bahrain                          | North Africa and Middle East | World Bank High Income         |
| 141                      | Egypt                            | North Africa and Middle East | World Bank Lower Middle Income |
| 142                      | Iran                             | North Africa and Middle East | World Bank Upper Middle Income |
| 143                      | Iraq                             | North Africa and Middle East | World Bank Upper Middle Income |
| 144                      | Jordan                           | North Africa and Middle East | World Bank Lower Middle Income |

| Continuation of Table ?? |                                  |                              |                                |
|--------------------------|----------------------------------|------------------------------|--------------------------------|
| Country id               | Country name                     | Region                       | World Bank group               |
| 145                      | Kuwait                           | North Africa and Middle East | World Bank High Income         |
| 146                      | Lebanon                          | North Africa and Middle East | World Bank Upper Middle Income |
| 147                      | Libya                            | North Africa and Middle East | World Bank Upper Middle Income |
| 148                      | Morocco                          | North Africa and Middle East | World Bank Lower Middle Income |
| 149                      | Palestine                        | North Africa and Middle East | World Bank Lower Middle Income |
| 150                      | Oman                             | North Africa and Middle East | World Bank High Income         |
| 151                      | Qatar                            | North Africa and Middle East | World Bank High Income         |
| 152                      | Saudi Arabia                     | North Africa and Middle East | World Bank High Income         |
| 153                      | Syria                            | North Africa and Middle East | World Bank Lower Middle Income |
| 154                      | Tunisia                          | North Africa and Middle East | World Bank Lower Middle Income |
| 155                      | Turkey                           | North Africa and Middle East | World Bank Upper Middle Income |
| 156                      | United Arab Emirates             | North Africa and Middle East | World Bank High Income         |
| 157                      | Yemen                            | North Africa and Middle East | World Bank Lower Middle Income |
| 160                      | Afghanistan                      | North Africa and Middle East | World Bank Low Income          |
| 161                      | Bangladesh                       | South Asia                   | World Bank Lower Middle Income |
| 162                      | Bhutan                           | South Asia                   | World Bank Lower Middle Income |
| 163                      | India                            | South Asia                   | World Bank Lower Middle Income |
| 164                      | Nepal                            | South Asia                   | World Bank Low Income          |
| 165                      | Pakistan                         | South Asia                   | World Bank Lower Middle Income |
| 168                      | Angola                           | Central Sub-Saharan Africa   | World Bank Lower Middle Income |
| 169                      | Central African Republic         | Central Sub-Saharan Africa   | World Bank Low Income          |
| 170                      | Congo                            | Central Sub-Saharan Africa   | World Bank Lower Middle Income |
| 171                      | Democratic Republic of the Congo | Central Sub-Saharan Africa   | World Bank Low Income          |
| 172                      | Equatorial Guinea                | Central Sub-Saharan Africa   | World Bank Upper Middle Income |
| 173                      | Gabon                            | Central Sub-Saharan Africa   | World Bank Upper Middle Income |
| 175                      | Burundi                          | Eastern Sub-Saharan Africa   | World Bank Low Income          |
| 176                      | Comoros                          | Eastern Sub-Saharan Africa   | World Bank Low Income          |
| 177                      | Djibouti                         | Eastern Sub-Saharan Africa   | World Bank Lower Middle Income |
| 178                      | Eritrea                          | Eastern Sub-Saharan Africa   | World Bank Low Income          |
| 179                      | Ethiopia                         | Eastern Sub-Saharan Africa   | World Bank Low Income          |
| 180                      | Kenya                            | Eastern Sub-Saharan Africa   | World Bank Lower Middle Income |
| 181                      | Madagascar                       | Eastern Sub-Saharan Africa   | World Bank Low Income          |
| 182                      | Malawi                           | Eastern Sub-Saharan Africa   | World Bank Low Income          |
| 183                      | Mauritius                        | Southeast Asia               | World Bank Upper Middle Income |
| 184                      | Mozambique                       | Eastern Sub-Saharan Africa   | World Bank Low Income          |
| 185                      | Rwanda                           | Eastern Sub-Saharan Africa   | World Bank Low Income          |
| 186                      | Seychelles                       | Southeast Asia               | World Bank High Income         |
| 187                      | Somalia                          | Eastern Sub-Saharan Africa   | World Bank Low Income          |
| 189                      | Tanzania                         | Eastern Sub-Saharan Africa   | World Bank Low Income          |
| 190                      | Uganda                           | Eastern Sub-Saharan Africa   | World Bank Low Income          |
| 191                      | Zambia                           | Eastern Sub-Saharan Africa   | World Bank Lower Middle Income |
| 193                      | Botswana                         | Southern Sub-Saharan Africa  | World Bank Upper Middle Income |
| 194                      | Lesotho                          | Southern Sub-Saharan Africa  | World Bank Lower Middle Income |
| 195                      | Namibia                          | Southern Sub-Saharan Africa  | World Bank Upper Middle Income |
| 196                      | South Africa                     | Southern Sub-Saharan Africa  | World Bank Upper Middle Income |
| 197                      | Swaziland                        | Southern Sub-Saharan Africa  | World Bank Lower Middle Income |
| 198                      | Zimbabwe                         | Southern Sub-Saharan Africa  | World Bank Low Income          |
| 200                      | Benin                            | Western Sub-Saharan Africa   | World Bank Low Income          |
| 201                      | Burkina Faso                     | Western Sub-Saharan Africa   | World Bank Low Income          |
| 202                      | Cameroon                         | Western Sub-Saharan Africa   | World Bank Lower Middle Income |
| 203                      | Cape Verde                       | Western Sub-Saharan Africa   | World Bank Lower Middle Income |
| 204                      | Chad                             | Western Sub-Saharan Africa   | World Bank Low Income          |
| 205                      | Cote d'Ivoire                    | Western Sub-Saharan Africa   | World Bank Lower Middle Income |
| 206                      | The Gambia                       | Western Sub-Saharan Africa   | World Bank Low Income          |
| 207                      | Ghana                            | Western Sub-Saharan Africa   | World Bank Lower Middle Income |
| 208                      | Guinea                           | Western Sub-Saharan Africa   | World Bank Low Income          |
| 209                      | Guinea-Bissau                    | Western Sub-Saharan Africa   | World Bank Low Income          |
| 210                      | Liberia                          | Western Sub-Saharan Africa   | World Bank Low Income          |
| 211                      | Mali                             | Western Sub-Saharan Africa   | World Bank Low Income          |
| 212                      | Mauritania                       | Western Sub-Saharan Africa   | World Bank Lower Middle Income |

| Continuation of Table ?? |                          |                              |                                |
|--------------------------|--------------------------|------------------------------|--------------------------------|
| Country id               | Country name             | Region                       | World Bank group               |
| 213                      | Niger                    | Western Sub-Saharan Africa   | World Bank Low Income          |
| 214                      | Nigeria                  | Western Sub-Saharan Africa   | World Bank Lower Middle Income |
| 215                      | Sao Tome and Principe    | Western Sub-Saharan Africa   | World Bank Lower Middle Income |
| 216                      | Senegal                  | Western Sub-Saharan Africa   | World Bank Low Income          |
| 217                      | Sierra Leone             | Western Sub-Saharan Africa   | World Bank Low Income          |
| 218                      | Togo                     | Western Sub-Saharan Africa   | World Bank Low Income          |
| 298                      | American Samoa           | Oceania                      | World Bank Upper Middle Income |
| 305                      | Bermuda                  | Caribbean                    | World Bank High Income         |
| 349                      | Greenland                | High-income North America    | World Bank High Income         |
| 351                      | Guam                     | Oceania                      | World Bank High Income         |
| 376                      | Northern Mariana Islands | Oceania                      | World Bank High Income         |
| 385                      | Puerto Rico              | Caribbean                    | World Bank High Income         |
| 422                      | Virgin Islands, U.S.     | Caribbean                    | World Bank High Income         |
| 435                      | South Sudan              | Eastern Sub-Saharan Africa   | World Bank Low Income          |
| 522                      | Sudan                    | North Africa and Middle East | World Bank Lower Middle Income |

Notes: Global Burden of Disease Study 2016
