# Supplementary material for: The development of nations conditions the disease space
Source: PubMed Central journal article supplement (PMC7790431; doi:10.1371/journal.pone.0244843), 2021-01-07
Supplement: pone.0244843.s002.pdf [file pone.0244843.s002.pdf]

**S2 Table. List of diseases and injuries in the dataset.**

| Disease id | Disease name                                                                  | Parent disease | Outline |
|------------|-------------------------------------------------------------------------------|----------------|---------|
| 294        | All causes                                                                    | 294            | Total   |
| 295        | Communicable, maternal, neonatal, and nutritional diseases                    | 294            | A       |
| 296        | HIV/AIDS and tuberculosis                                                     | 295            | A.1     |
| 297        | Tuberculosis                                                                  | 296            | A.1.1   |
| 934        | Drug-susceptible tuberculosis                                                 | 297            | A.1.1.1 |
| 946        | Multidrug-resistant tuberculosis without extensive drug resistance            | 297            | A.1.1.2 |
| 947        | Extensively drug-resistant tuberculosis                                       | 297            | A.1.1.3 |
| 954        | Latent tuberculosis infection                                                 | 297            | A.1.1.4 |
| 298        | HIV/AIDS                                                                      | 296            | A.1.2   |
| 948        | Drug-susceptible HIV/AIDS - Tuberculosis                                      | 298            | A.1.2.1 |
| 949        | Multidrug-resistant HIV/AIDS - Tuberculosis without extensive drug resistance | 298            | A.1.2.2 |
| 950        | Extensively drug-resistant HIV/AIDS - Tuberculosis                            | 298            | A.1.2.3 |
| 300        | HIV/AIDS resulting in other diseases                                          | 298            | A.1.2.4 |
| 301        | Diarrhea, lower respiratory, and other common infectious diseases             | 295            | A.2     |
| 302        | Diarrheal diseases                                                            | 301            | A.2.1   |
| 318        | Intestinal infectious diseases                                                | 301            | A.2.2   |
| 319        | Typhoid fever                                                                 | 318            | A.2.2.1 |
| 320        | Paratyphoid fever                                                             | 318            | A.2.2.2 |
| 321        | Other intestinal infectious diseases                                          | 318            | A.2.2.3 |
| 322        | Lower respiratory infections                                                  | 301            | A.2.3   |
| 328        | Upper respiratory infections                                                  | 301            | A.2.4   |
| 329        | Otitis media                                                                  | 301            | A.2.5   |
| 332        | Meningitis                                                                    | 301            | A.2.6   |
| 333        | Pneumococcal meningitis                                                       | 332            | A.2.6.1 |
| 334        | H influenzae type B meningitis                                                | 332            | A.2.6.2 |
| 335        | Meningococcal meningitis                                                      | 332            | A.2.6.3 |
| 336        | Other meningitis                                                              | 332            | A.2.6.4 |
| 337        | Encephalitis                                                                  | 301            | A.2.7   |
| 338        | Diphtheria                                                                    | 301            | A.2.8   |
| 339        | Whooping cough                                                                | 301            | A.2.9   |
| 340        | Tetanus                                                                       | 301            | A.2.10  |
| 341        | Measles                                                                       | 301            | A.2.11  |
| 342        | Varicella and herpes zoster                                                   | 301            | A.2.12  |

| Continuation of Table ?? |                                                                  |                |          |
|--------------------------|------------------------------------------------------------------|----------------|----------|
| Disease id               | Disease name                                                     | Parent disease | Outline  |
| 344                      | Neglected tropical diseases and malaria                          | 295            | A.3      |
| 345                      | Malaria                                                          | 344            | A.3.1    |
| 346                      | Chagas disease                                                   | 344            | A.3.2    |
| 347                      | Leishmaniasis                                                    | 344            | A.3.3    |
| 348                      | Visceral leishmaniasis                                           | 347            | A.3.3.1  |
| 349                      | Cutaneous and mucocutaneous leishmaniasis                        | 347            | A.3.3.2  |
| 350                      | African trypanosomiasis                                          | 344            | A.3.4    |
| 351                      | Schistosomiasis                                                  | 344            | A.3.5    |
| 352                      | Cysticercosis                                                    | 344            | A.3.6    |
| 353                      | Cystic echinococcosis                                            | 344            | A.3.7    |
| 354                      | Lymphatic filariasis                                             | 344            | A.3.8    |
| 355                      | Onchocerciasis                                                   | 344            | A.3.9    |
| 356                      | Trachoma                                                         | 344            | A.3.10   |
| 357                      | Dengue                                                           | 344            | A.3.11   |
| 358                      | Yellow fever                                                     | 344            | A.3.12   |
| 359                      | Rabies                                                           | 344            | A.3.13   |
| 360                      | Intestinal nematode infections                                   | 344            | A.3.14   |
| 361                      | Ascariasis                                                       | 360            | A.3.14.1 |
| 362                      | Trichuriasis                                                     | 360            | A.3.14.2 |
| 363                      | Hookworm disease                                                 | 360            | A.3.14.3 |
| 364                      | Food-borne trematodiasis                                         | 344            | A.3.15   |
| 405                      | Leprosy                                                          | 344            | A.3.16   |
| 843                      | Ebola                                                            | 344            | A.3.17   |
| 935                      | Zika virus                                                       | 344            | A.3.18   |
| 936                      | Guinea worm disease                                              | 344            | A.3.19   |
| 365                      | Other neglected tropical diseases                                | 344            | A.3.20   |
| 366                      | Maternal disorders                                               | 295            | A.4      |
| 367                      | Maternal hemorrhage                                              | 366            | A.4.1    |
| 368                      | Maternal sepsis and other maternal infections                    | 366            | A.4.2    |
| 369                      | Maternal hypertensive disorders                                  | 366            | A.4.3    |
| 370                      | Maternal obstructed labor and uterine rupture                    | 366            | A.4.4    |
| 371                      | Maternal abortion, miscarriage, and ectopic pregnancy            | 366            | A.4.5    |
| 375                      | Indirect maternal deaths                                         | 366            | A.4.6    |
| 376                      | Late maternal deaths                                             | 366            | A.4.7    |
| 741                      | Maternal deaths aggravated by HIV/AIDS                           | 366            | A.4.8    |
| 379                      | Other maternal disorders                                         | 366            | A.4.9    |
| 380                      | Neonatal disorders                                               | 295            | A.5      |
| 381                      | Neonatal preterm birth complications                             | 380            | A.5.1    |
| 382                      | Neonatal encephalopathy due to birth asphyxia and trauma         | 380            | A.5.2    |
| 383                      | Neonatal sepsis and other neonatal infections                    | 380            | A.5.3    |
| 384                      | Hemolytic disease and other neonatal jaundice                    | 380            | A.5.4    |
| 385                      | Other neonatal disorders                                         | 380            | A.5.5    |
| 386                      | Nutritional deficiencies                                         | 295            | A.6      |
| 387                      | Protein-energy malnutrition                                      | 386            | A.6.1    |
| 388                      | Iodine deficiency                                                | 386            | A.6.2    |
| 389                      | Vitamin A deficiency                                             | 386            | A.6.3    |
| 390                      | Iron-deficiency anemia                                           | 386            | A.6.4    |
| 391                      | Other nutritional deficiencies                                   | 386            | A.6.5    |
| 392                      | Other communicable, maternal, neonatal, and nutritional diseases | 295            | A.7      |
| 393                      | Sexually transmitted diseases excluding HIV                      | 392            | A.7.1    |
| 394                      | Syphilis                                                         | 393            | A.7.1.1  |
| 395                      | Chlamydial infection                                             | 393            | A.7.1.2  |
| 396                      | Gonococcal infection                                             | 393            | A.7.1.3  |
| 397                      | Trichomoniasis                                                   | 393            | A.7.1.4  |
| 398                      | Genital herpes                                                   | 393            | A.7.1.5  |
| 399                      | Other sexually transmitted diseases                              | 393            | A.7.1.6  |
| 400                      | Hepatitis                                                        | 392            | A.7.2    |
| 401                      | Acute hepatitis A                                                | 400            | A.7.2.1  |
| 402                      | Hepatitis B                                                      | 400            | A.7.2.2  |
| 403                      | Hepatitis C                                                      | 400            | A.7.2.3  |

| Continuation of Table ?? |                                                    |                |          |
|--------------------------|----------------------------------------------------|----------------|----------|
| Disease id               | Disease name                                       | Parent disease | Outline  |
| 404                      | Acute hepatitis E                                  | 400            | A.7.2.4  |
| 408                      | Other infectious diseases                          | 392            | A.7.3    |
| 409                      | Non-communicable diseases                          | 294            | B        |
| 410                      | Neoplasms                                          | 409            | B.1      |
| 444                      | Lip and oral cavity cancer                         | 410            | B.1.1    |
| 447                      | Nasopharynx cancer                                 | 410            | B.1.2    |
| 450                      | Other pharynx cancer                               | 410            | B.1.3    |
| 411                      | Esophageal cancer                                  | 410            | B.1.4    |
| 414                      | Stomach cancer                                     | 410            | B.1.5    |
| 441                      | Colon and rectum cancer                            | 410            | B.1.6    |
| 417                      | Liver cancer                                       | 410            | B.1.7    |
| 418                      | Liver cancer due to hepatitis B                    | 417            | B.1.7.1  |
| 419                      | Liver cancer due to hepatitis C                    | 417            | B.1.7.2  |
| 420                      | Liver cancer due to alcohol use                    | 417            | B.1.7.3  |
| 421                      | Liver cancer due to other causes                   | 417            | B.1.7.4  |
| 453                      | Gallbladder and biliary tract cancer               | 410            | B.1.8    |
| 456                      | Pancreatic cancer                                  | 410            | B.1.9    |
| 423                      | Larynx cancer                                      | 410            | B.1.10   |
| 426                      | Tracheal, bronchus, and lung cancer                | 410            | B.1.11   |
| 459                      | Malignant skin melanoma                            | 410            | B.1.12   |
| 462                      | Non-melanoma skin cancer                           | 410            | B.1.13   |
| 849                      | Non-melanoma skin cancer (squamous-cell carcinoma) | 462            | B.1.13.1 |
| 850                      | Non-melanoma skin cancer (basal-cell carcinoma)    | 462            | B.1.13.2 |
| 429                      | Breast cancer                                      | 410            | B.1.14   |
| 432                      | Cervical cancer                                    | 410            | B.1.15   |
| 435                      | Uterine cancer                                     | 410            | B.1.16   |
| 465                      | Ovarian cancer                                     | 410            | B.1.17   |
| 438                      | Prostate cancer                                    | 410            | B.1.18   |
| 468                      | Testicular cancer                                  | 410            | B.1.19   |
| 471                      | Kidney cancer                                      | 410            | B.1.20   |
| 474                      | Bladder cancer                                     | 410            | B.1.21   |
| 477                      | Brain and nervous system cancer                    | 410            | B.1.22   |
| 480                      | Thyroid cancer                                     | 410            | B.1.23   |
| 483                      | Mesothelioma                                       | 410            | B.1.24   |
| 484                      | Hodgkin lymphoma                                   | 410            | B.1.25   |
| 485                      | Non-Hodgkin lymphoma                               | 410            | B.1.26   |
| 486                      | Multiple myeloma                                   | 410            | B.1.27   |
| 487                      | Leukemia                                           | 410            | B.1.28   |
| 845                      | Acute lymphoid leukemia                            | 487            | B.1.28.1 |
| 846                      | Chronic lymphoid leukemia                          | 487            | B.1.28.2 |
| 847                      | Acute myeloid leukemia                             | 487            | B.1.28.3 |
| 848                      | Chronic myeloid leukemia                           | 487            | B.1.28.4 |
| 943                      | Other leukemia                                     | 487            | B.1.28.5 |
| 488                      | Other neoplasms                                    | 410            | B.1.29   |
| 491                      | Cardiovascular diseases                            | 409            | B.2      |
| 492                      | Rheumatic heart disease                            | 491            | B.2.1    |
| 493                      | Ischemic heart disease                             | 491            | B.2.2    |
| 494                      | Cerebrovascular disease                            | 491            | B.2.3    |
| 495                      | Ischemic stroke                                    | 494            | B.2.3.1  |
| 496                      | Hemorrhagic stroke                                 | 494            | B.2.3.2  |
| 498                      | Hypertensive heart disease                         | 491            | B.2.4    |
| 499                      | Cardiomyopathy and myocarditis                     | 491            | B.2.5    |
| 942                      | Myocarditis                                        | 499            | B.2.5.1  |
| 938                      | Alcoholic cardiomyopathy                           | 499            | B.2.5.2  |
| 944                      | Other cardiomyopathy                               | 499            | B.2.5.3  |
| 500                      | Atrial fibrillation and flutter                    | 491            | B.2.6    |
| 501                      | Aortic aneurysm                                    | 491            | B.2.7    |
| 502                      | Peripheral artery disease                          | 491            | B.2.8    |
| 503                      | Endocarditis                                       | 491            | B.2.9    |
| 507                      | Other cardiovascular and circulatory diseases      | 491            | B.2.10   |

| Continuation of Table ?? |                                                                |                |         |
|--------------------------|----------------------------------------------------------------|----------------|---------|
| Disease id               | Disease name                                                   | Parent disease | Outline |
| 508                      | Chronic respiratory diseases                                   | 409            | B.3     |
| 509                      | Chronic obstructive pulmonary disease                          | 508            | B.3.1   |
| 510                      | Pneumoconiosis                                                 | 508            | B.3.2   |
| 511                      | Silicosis                                                      | 510            | B.3.2.1 |
| 512                      | Asbestosis                                                     | 510            | B.3.2.2 |
| 513                      | Coal workers pneumoconiosis                                    | 510            | B.3.2.3 |
| 514                      | Other pneumoconiosis                                           | 510            | B.3.2.4 |
| 515                      | Asthma                                                         | 508            | B.3.3   |
| 516                      | Interstitial lung disease and pulmonary sarcoidosis            | 508            | B.3.4   |
| 520                      | Other chronic respiratory diseases                             | 508            | B.3.5   |
| 521                      | Cirrhosis and other chronic liver diseases                     | 409            | B.4     |
| 522                      | Cirrhosis and other chronic liver diseases due to hepatitis B  | 521            | B.4.1   |
| 523                      | Cirrhosis and other chronic liver diseases due to hepatitis C  | 521            | B.4.2   |
| 524                      | Cirrhosis and other chronic liver diseases due to alcohol use  | 521            | B.4.3   |
| 525                      | Cirrhosis and other chronic liver diseases due to other causes | 521            | B.4.4   |
| 526                      | Digestive diseases                                             | 409            | B.5     |
| 527                      | Peptic ulcer disease                                           | 526            | B.5.1   |
| 528                      | Gastritis and duodenitis                                       | 526            | B.5.2   |
| 529                      | Appendicitis                                                   | 526            | B.5.3   |
| 530                      | Paralytic ileus and intestinal obstruction                     | 526            | B.5.4   |
| 531                      | Inguinal, femoral, and abdominal hernia                        | 526            | B.5.5   |
| 532                      | Inflammatory bowel disease                                     | 526            | B.5.6   |
| 533                      | Vascular intestinal disorders                                  | 526            | B.5.7   |
| 534                      | Gallbladder and biliary diseases                               | 526            | B.5.8   |
| 535                      | Pancreatitis                                                   | 526            | B.5.9   |
| 541                      | Other digestive diseases                                       | 526            | B.5.10  |
| 542                      | Neurological disorders                                         | 409            | B.6     |
| 543                      | Alzheimer disease and other dementias                          | 542            | B.6.1   |
| 544                      | Parkinson disease                                              | 542            | B.6.2   |
| 545                      | Epilepsy                                                       | 542            | B.6.3   |
| 546                      | Multiple sclerosis                                             | 542            | B.6.4   |
| 554                      | Motor neuron disease                                           | 542            | B.6.5   |
| 547                      | Migraine                                                       | 542            | B.6.6   |
| 548                      | Tension-type headache                                          | 542            | B.6.7   |
| 557                      | Other neurological disorders                                   | 542            | B.6.8   |
| 558                      | Mental and substance use disorders                             | 409            | B.7     |
| 559                      | Schizophrenia                                                  | 558            | B.7.1   |
| 560                      | Alcohol use disorders                                          | 558            | B.7.2   |
| 561                      | Drug use disorders                                             | 558            | B.7.3   |
| 562                      | Opioid use disorders                                           | 561            | B.7.3.1 |
| 563                      | Cocaine use disorders                                          | 561            | B.7.3.2 |
| 564                      | Amphetamine use disorders                                      | 561            | B.7.3.3 |
| 565                      | Cannabis use disorders                                         | 561            | B.7.3.4 |
| 566                      | Other drug use disorders                                       | 561            | B.7.3.5 |
| 567                      | Depressive disorders                                           | 558            | B.7.4   |
| 568                      | Major depressive disorder                                      | 567            | B.7.4.1 |
| 569                      | Dysthymia                                                      | 567            | B.7.4.2 |
| 570                      | Bipolar disorder                                               | 558            | B.7.5   |
| 571                      | Anxiety disorders                                              | 558            | B.7.6   |
| 572                      | Eating disorders                                               | 558            | B.7.7   |
| 573                      | Anorexia nervosa                                               | 572            | B.7.7.1 |
| 574                      | Bulimia nervosa                                                | 572            | B.7.7.2 |
| 575                      | Autistic spectrum disorders                                    | 558            | B.7.8   |
| 576                      | Autism                                                         | 575            | B.7.8.1 |
| 577                      | Asperger syndrome and other autistic spectrum disorders        | 575            | B.7.8.2 |
| 578                      | Attention-deficit/hyperactivity disorder                       | 558            | B.7.9   |
| 579                      | Conduct disorder                                               | 558            | B.7.10  |
| 582                      | Idiopathic developmental intellectual disability               | 558            | B.7.11  |
| 585                      | Other mental and substance use disorders                       | 558            | B.7.12  |
| 586                      | Diabetes, urogenital, blood, and endocrine diseases            | 409            | B.8     |

| Continuation of Table ?? |                                                     |                |           |
|--------------------------|-----------------------------------------------------|----------------|-----------|
| Disease id               | Disease name                                        | Parent disease | Outline   |
| 587                      | Diabetes mellitus                                   | 586            | B.8.1     |
| 588                      | Acute glomerulonephritis                            | 586            | B.8.2     |
| 589                      | Chronic kidney disease                              | 586            | B.8.3     |
| 590                      | Chronic kidney disease due to diabetes mellitus     | 589            | B.8.3.1   |
| 591                      | Chronic kidney disease due to hypertension          | 589            | B.8.3.2   |
| 592                      | Chronic kidney disease due to glomerulonephritis    | 589            | B.8.3.3   |
| 593                      | Chronic kidney disease due to other causes          | 589            | B.8.3.4   |
| 594                      | Urinary diseases and male infertility               | 586            | B.8.4     |
| 595                      | Interstitial nephritis and urinary tract infections | 594            | B.8.4.1   |
| 596                      | Urolithiasis                                        | 594            | B.8.4.2   |
| 597                      | Benign prostatic hyperplasia                        | 594            | B.8.4.3   |
| 598                      | Male infertility                                    | 594            | B.8.4.4   |
| 602                      | Other urinary diseases                              | 594            | B.8.4.5   |
| 603                      | Gynecological diseases                              | 586            | B.8.5     |
| 604                      | Uterine fibroids                                    | 603            | B.8.5.1   |
| 605                      | Polycystic ovarian syndrome                         | 603            | B.8.5.2   |
| 606                      | Female infertility                                  | 603            | B.8.5.3   |
| 607                      | Endometriosis                                       | 603            | B.8.5.4   |
| 608                      | Genital prolapse                                    | 603            | B.8.5.5   |
| 609                      | Premenstrual syndrome                               | 603            | B.8.5.6   |
| 612                      | Other gynecological diseases                        | 603            | B.8.5.7   |
| 613                      | Hemoglobinopathies and hemolytic anemias            | 586            | B.8.6     |
| 614                      | Thalassemias                                        | 613            | B.8.6.1   |
| 837                      | Thalassemias trait                                  | 613            | B.8.6.2   |
| 615                      | Sickle cell disorders                               | 613            | B.8.6.3   |
| 838                      | Sickle cell trait                                   | 613            | B.8.6.4   |
| 616                      | G6PD deficiency                                     | 613            | B.8.6.5   |
| 839                      | G6PD trait                                          | 613            | B.8.6.6   |
| 618                      | Other hemoglobinopathies and hemolytic anemias      | 613            | B.8.6.7   |
| 619                      | Endocrine, metabolic, blood, and immune disorders   | 586            | B.8.7     |
| 626                      | Musculoskeletal disorders                           | 409            | B.9       |
| 627                      | Rheumatoid arthritis                                | 626            | B.9.1     |
| 628                      | Osteoarthritis                                      | 626            | B.9.2     |
| 629                      | Low back and neck pain                              | 626            | B.9.3     |
| 630                      | Low back pain                                       | 629            | B.9.3.1   |
| 631                      | Neck pain                                           | 629            | B.9.3.2   |
| 632                      | Gout                                                | 626            | B.9.4     |
| 639                      | Other musculoskeletal disorders                     | 626            | B.9.5     |
| 640                      | Other non-communicable diseases                     | 409            | B.10      |
| 641                      | Congenital birth defects                            | 640            | B.10.1    |
| 642                      | Neural tube defects                                 | 641            | B.10.1.1  |
| 643                      | Congenital heart anomalies                          | 641            | B.10.1.2  |
| 644                      | Orofacial clefts                                    | 641            | B.10.1.3  |
| 645                      | Down syndrome                                       | 641            | B.10.1.4  |
| 646                      | Turner syndrome                                     | 641            | B.10.1.5  |
| 647                      | Klinefelter syndrome                                | 641            | B.10.1.6  |
| 648                      | Other chromosomal abnormalities                     | 641            | B.10.1.7  |
| 649                      | Congenital musculoskeletal and limb anomalies       | 641            | B.10.1.8  |
| 650                      | Urogenital congenital anomalies                     | 641            | B.10.1.9  |
| 651                      | Digestive congenital anomalies                      | 641            | B.10.1.10 |
| 652                      | Other congenital birth defects                      | 641            | B.10.1.11 |
| 653                      | Skin and subcutaneous diseases                      | 640            | B.10.2    |
| 654                      | Dermatitis                                          | 653            | B.10.2.1  |
| 655                      | Psoriasis                                           | 653            | B.10.2.2  |
| 656                      | Cellulitis                                          | 653            | B.10.2.3  |
| 657                      | Pyoderma                                            | 653            | B.10.2.4  |
| 658                      | Scabies                                             | 653            | B.10.2.5  |
| 659                      | Fungal skin diseases                                | 653            | B.10.2.6  |
| 660                      | Viral skin diseases                                 | 653            | B.10.2.7  |
| 661                      | Acne vulgaris                                       | 653            | B.10.2.8  |

| Continuation of Table ?? |                                                                              |                |           |
|--------------------------|------------------------------------------------------------------------------|----------------|-----------|
| Disease id               | Disease name                                                                 | Parent disease | Outline   |
| 662                      | Alopecia areata                                                              | 653            | B.10.2.9  |
| 663                      | Pruritus                                                                     | 653            | B.10.2.10 |
| 664                      | Urticaria                                                                    | 653            | B.10.2.11 |
| 665                      | Decubitus ulcer                                                              | 653            | B.10.2.12 |
| 668                      | Other skin and subcutaneous diseases                                         | 653            | B.10.2.13 |
| 669                      | Sense organ diseases                                                         | 640            | B.10.3    |
| 670                      | Glaucoma                                                                     | 669            | B.10.3.1  |
| 671                      | Cataract                                                                     | 669            | B.10.3.2  |
| 672                      | Macular degeneration                                                         | 669            | B.10.3.3  |
| 673                      | Refraction and accommodation disorders                                       | 669            | B.10.3.4  |
| 674                      | Age-related and other hearing loss                                           | 669            | B.10.3.5  |
| 675                      | Other vision loss                                                            | 669            | B.10.3.6  |
| 679                      | Other sense organ diseases                                                   | 669            | B.10.3.7  |
| 680                      | Oral disorders                                                               | 640            | B.10.4    |
| 681                      | Caries of deciduous teeth                                                    | 680            | B.10.4.1  |
| 682                      | Caries of permanent teeth                                                    | 680            | B.10.4.2  |
| 683                      | Periodontal diseases                                                         | 680            | B.10.4.3  |
| 684                      | Edentulism and severe tooth loss                                             | 680            | B.10.4.4  |
| 685                      | Other oral disorders                                                         | 680            | B.10.4.5  |
| 686                      | Sudden infant death syndrome                                                 | 640            | B.10.5    |
| 687                      | Injuries                                                                     | 294            | C         |
| 688                      | Transport injuries                                                           | 687            | C.1       |
| 689                      | Road injuries                                                                | 688            | C.1.1     |
| 690                      | Pedestrian road injuries                                                     | 689            | C.1.1.1   |
| 691                      | Cyclist road injuries                                                        | 689            | C.1.1.2   |
| 692                      | Motorcyclist road injuries                                                   | 689            | C.1.1.3   |
| 693                      | Motor vehicle road injuries                                                  | 689            | C.1.1.4   |
| 694                      | Other road injuries                                                          | 689            | C.1.1.5   |
| 695                      | Other transport injuries                                                     | 688            | C.1.2     |
| 696                      | Unintentional injuries                                                       | 687            | C.2       |
| 697                      | Falls                                                                        | 696            | C.2.1     |
| 698                      | Drowning                                                                     | 696            | C.2.2     |
| 699                      | Fire, heat, and hot substances                                               | 696            | C.2.3     |
| 700                      | Poisonings                                                                   | 696            | C.2.4     |
| 704                      | Exposure to mechanical forces                                                | 696            | C.2.5     |
| 705                      | Unintentional firearm injuries                                               | 704            | C.2.5.1   |
| 706                      | Unintentional suffocation                                                    | 704            | C.2.5.2   |
| 707                      | Other exposure to mechanical forces                                          | 704            | C.2.5.3   |
| 708                      | Adverse effects of medical treatment                                         | 696            | C.2.6     |
| 709                      | Animal contact                                                               | 696            | C.2.7     |
| 710                      | Venomous animal contact                                                      | 709            | C.2.7.1   |
| 711                      | Non-venomous animal contact                                                  | 709            | C.2.7.2   |
| 712                      | Foreign body                                                                 | 696            | C.2.8     |
| 713                      | Pulmonary aspiration and foreign body in airway                              | 712            | C.2.8.1   |
| 714                      | Foreign body in eyes                                                         | 712            | C.2.8.2   |
| 715                      | Foreign body in other body part                                              | 712            | C.2.8.3   |
| 842                      | Environmental heat and cold exposure                                         | 696            | C.2.9     |
| 716                      | Other unintentional injuries                                                 | 696            | C.2.10    |
| 717                      | Self-harm and interpersonal violence                                         | 687            | C.3       |
| 718                      | Self-harm                                                                    | 717            | C.3.1     |
| 721                      | Self-harm by firearm                                                         | 718            | C.3.1.1   |
| 723                      | Self-harm by other specified means                                           | 718            | C.3.1.2   |
| 724                      | Interpersonal violence                                                       | 717            | C.3.2     |
| 725                      | Physical violence by firearm                                                 | 724            | C.3.2.1   |
| 726                      | Physical violence by sharp object                                            | 724            | C.3.2.2   |
| 941                      | Sexual violence                                                              | 724            | C.3.2.3   |
| 727                      | Physical violence by other means                                             | 724            | C.3.2.4   |
| 728                      | Forces of nature, conflict and terrorism, and executions and police conflict | 687            | C.4       |
| 729                      | Exposure to forces of nature                                                 | 728            | C.4.1     |
| 945                      | Conflict and terrorism                                                       | 728            | C.4.3     |

| Continuation of Table ??                   |                                |                |         |
|--------------------------------------------|--------------------------------|----------------|---------|
| Disease id                                 | Disease name                   | Parent disease | Outline |
| 854                                        | Executions and police conflict | 728            | C.4.2   |
| Notes: Global Burden of Disease Study 2016 |                                |                |         |
